# Supplementary material for: Reliability and validity of Oswestry Disability Index among patients undergoing lumbar spinal surgery
Source: PubMed Central journal article supplement (PMC10765861; doi:10.1186/s12893-023-02307-w), 2024-01-03

Supplement 1. Factor analysis by surgery types - scree plots and path diagrams

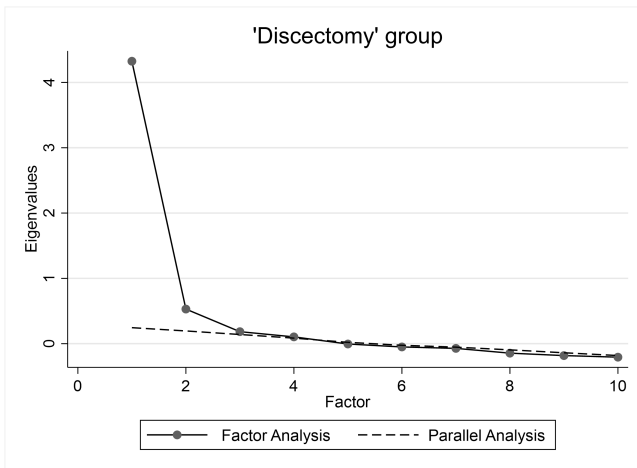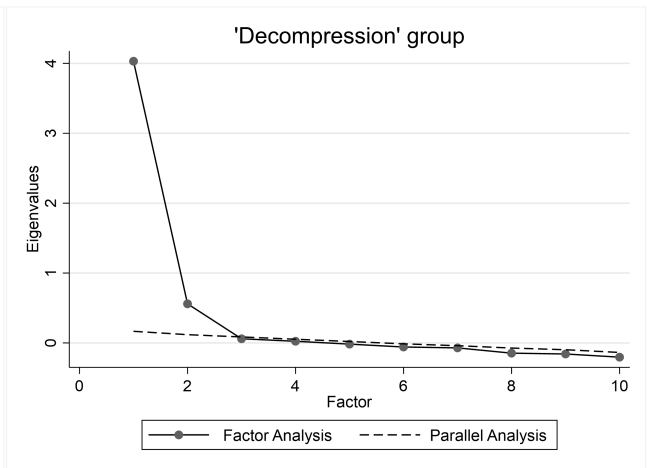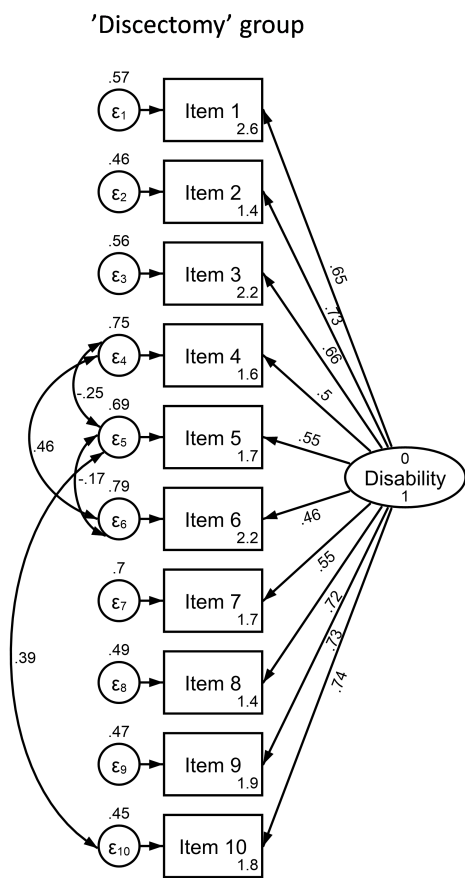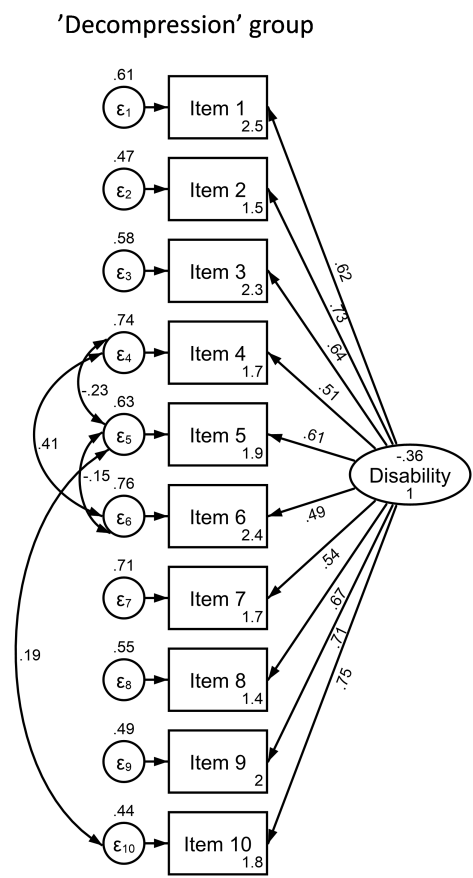

Supplement: 12893_2023_2307_MOESM1_ESM.pdf [file 12893_2023_2307_MOESM1_ESM.pdf]
